# Supplementary material for: Transparent thermal insulation ceramic aerogel materials for solar thermal conversion
Source: Royal Society of Chemistry journal article supplement (doi:10.1039/d2na00412g), 2022-01-01
Supplement: d2na00412g1.pdf [file d2na00412g1.pdf]

## Supporting Information

### **Transparent thermal insulation ceramic aerogel materials for solar thermal conversion**

*Lu An*<sup>1</sup>, *Zheng Li*<sup>1</sup>, *Zipeng Guo*<sup>2</sup>, *Yong Hu*<sup>1</sup>, *Yulong Huang*<sup>1</sup>, *Jason N Armstrong*<sup>1</sup>, *Chi Zhou*<sup>2</sup>,  
*Shenqiang Ren*<sup>1,3,4\*</sup>

<sup>1</sup>Department of Mechanical and Aerospace Engineering, University at Buffalo, The State University of New York, Buffalo, NY 14260, USA

<sup>2</sup>Department of Industrial and Systems Engineering, University at Buffalo, The State University of New York, Buffalo, NY 14260, USA

<sup>3</sup>Department of Chemistry, University at Buffalo, The State University of New York, Buffalo, NY 14260, USA

<sup>4</sup>Research and Education in Energy, Environment & Water (RENEW) Institute, University at Buffalo, The State University of New York, Buffalo, NY 14260, USA

\*E-mail: [shenren@buffalo.edu](mailto:shenren@buffalo.edu)

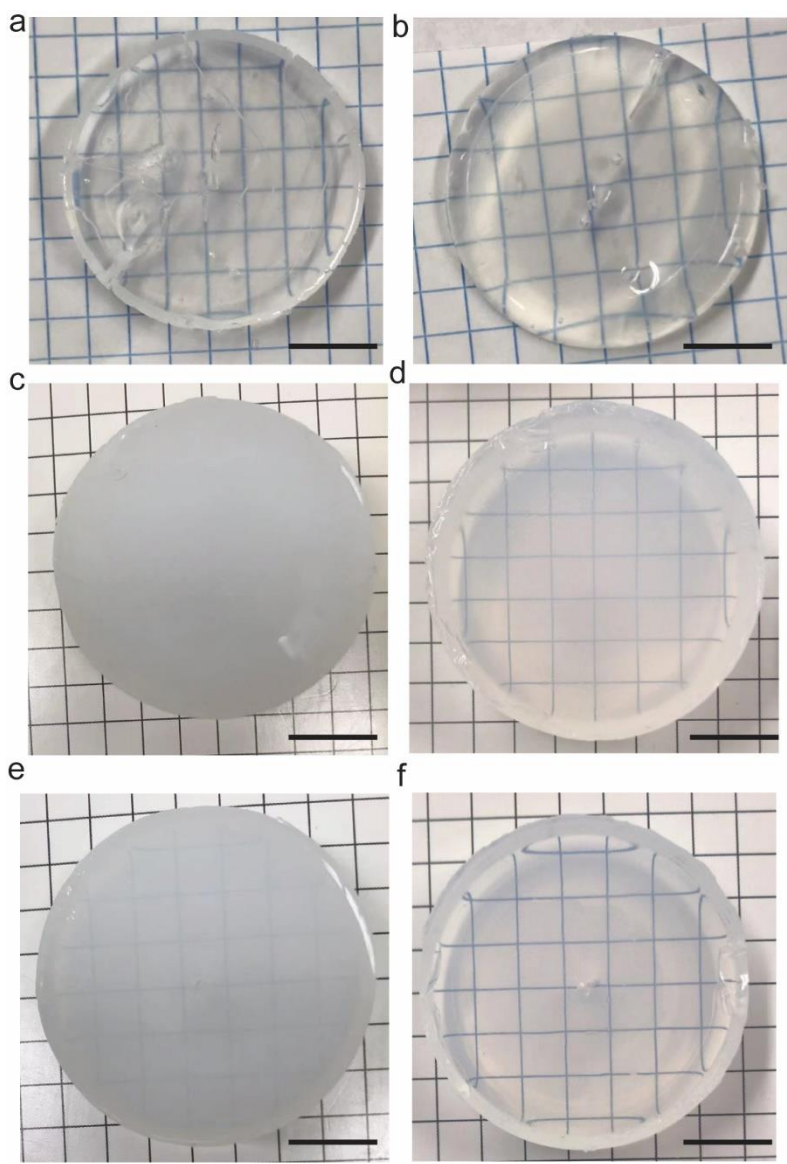

Fig. S1. Optical image of gels with the initial pH of (a) 6.5 (b) 3.2 after solvent exchange. The gels with initial pH of 2.8 (c) before the solvent exchange, and (d) after solvent exchange. The gels with initial pH of 2.5 (e) before solvent exchange, and (f) after solvent exchange. Scale bars are 10 mm.

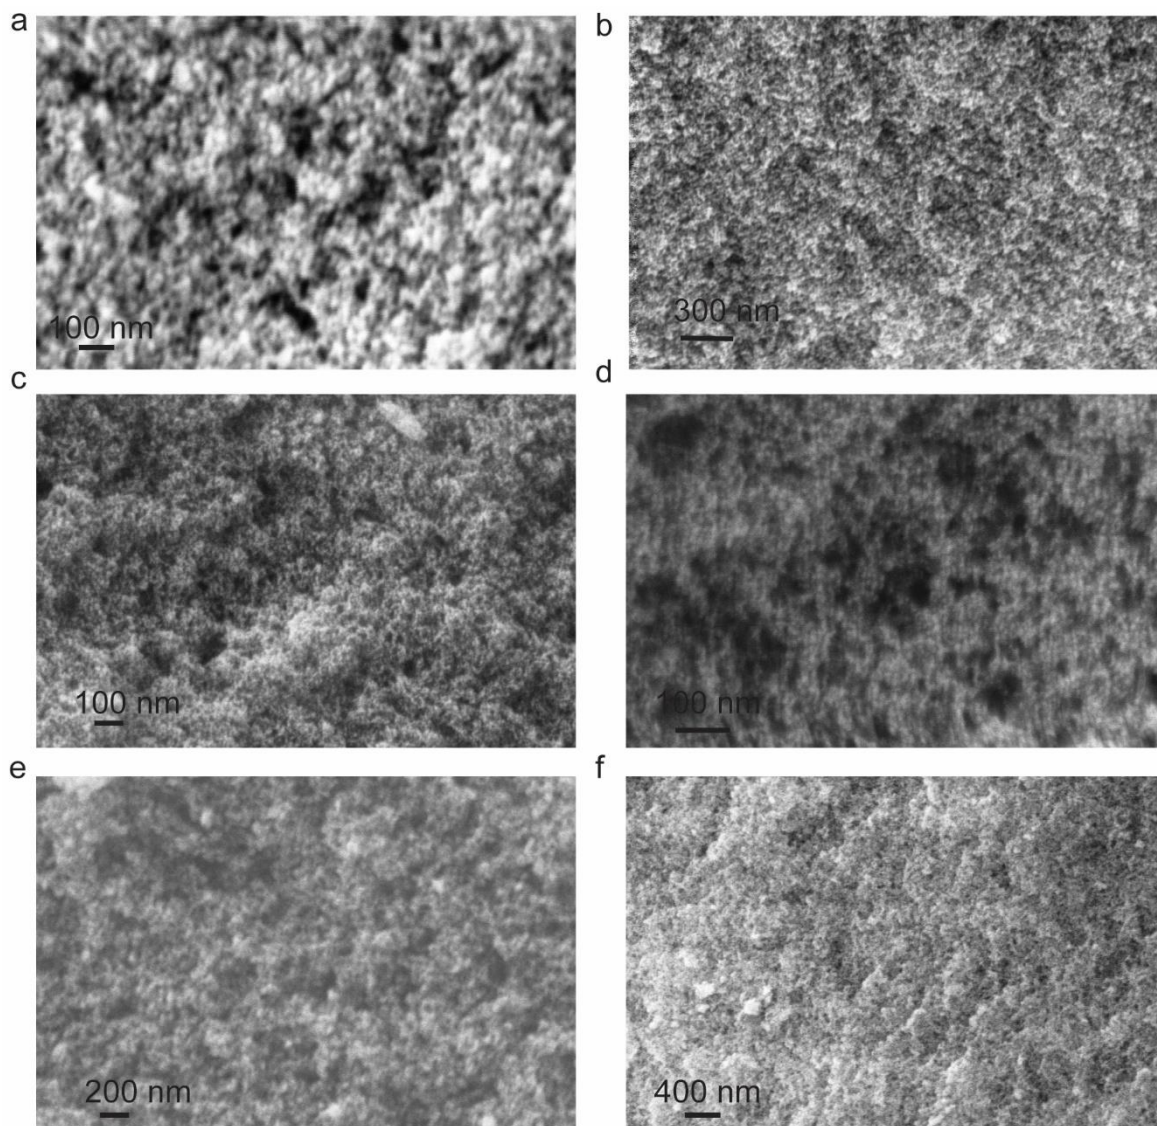

Fig. S2. SEM images of different samples with initial pH of (a) 6.5, (b) 3.2, (c) 2.8, and (d) 2.5, (e) 2.2 (f) 2.

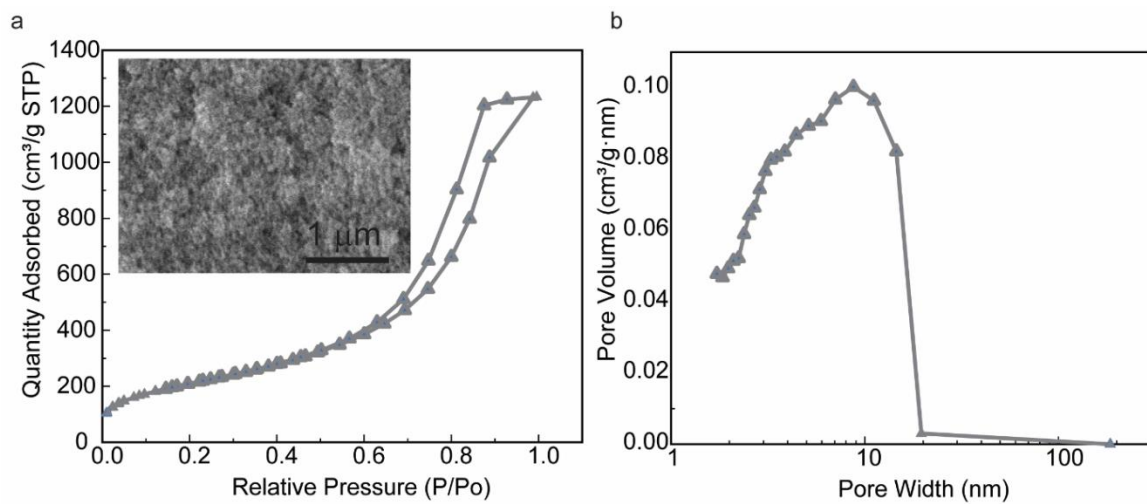

Fig. S3. (a) BET curve of sample with the initial pH of 4, and (b) pore size distribution.

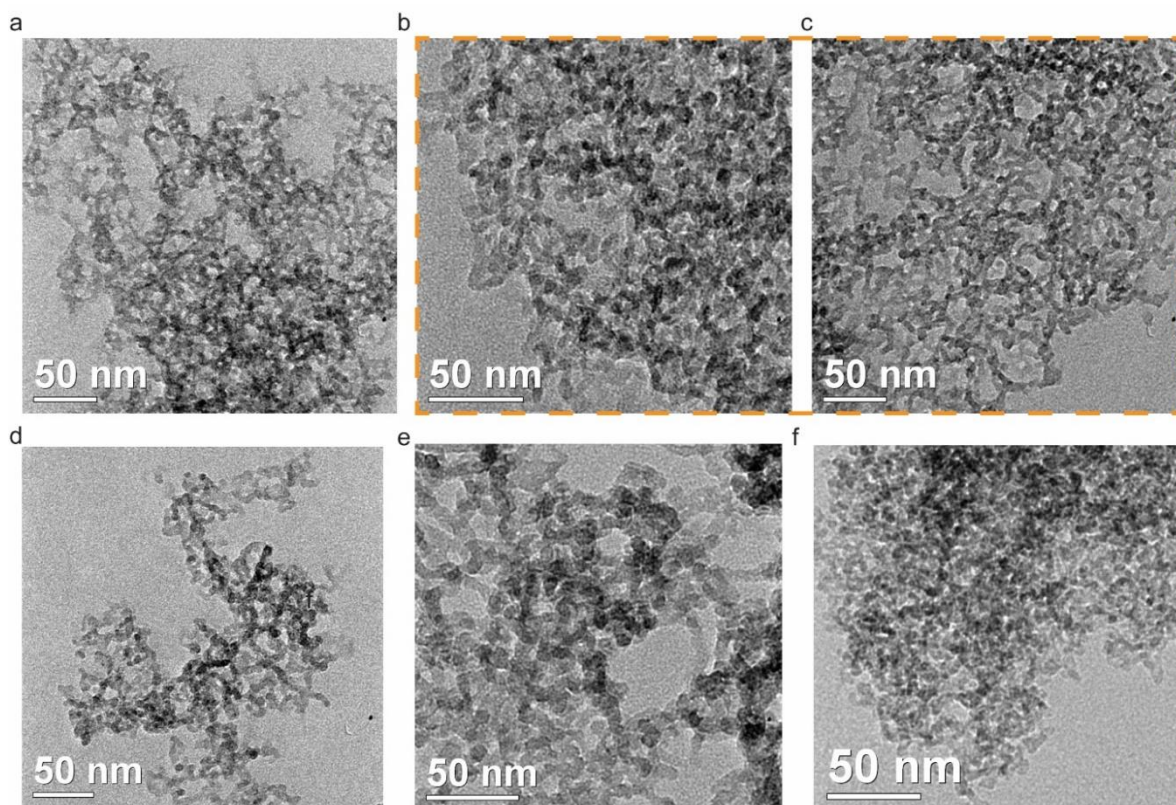

Fig. S4. TEM images of gels with the initial pH of (a) 6.5, (b) 2.5, and the hydrophobic dried sample with the initial pH of (c) 2.5, (d) 3.2, (e) 2.8, and (f) sintered sample.

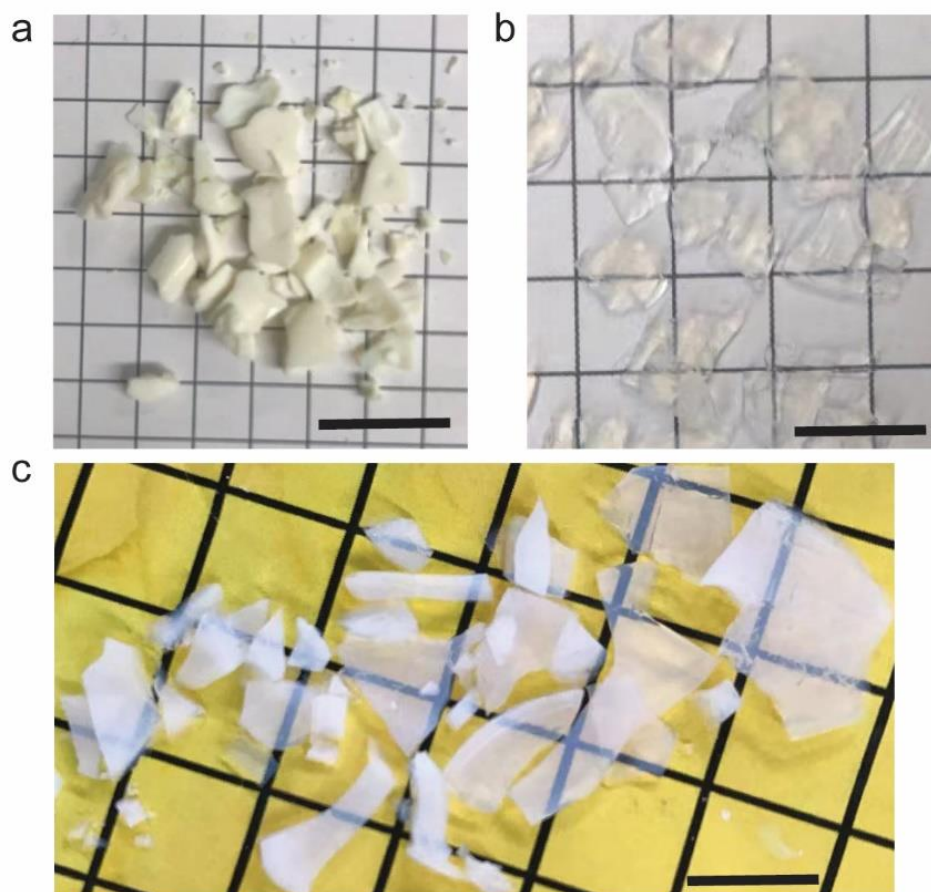

Fig. S5. Optical images of (a-b) dried TMCS silylation modified silica flakes (yellow color induced by not enough modification), and the transparent silica after sintering treatment. (c) Hydrophobic silylation modified transparent silica flakes. Scale bars are 10 mm.

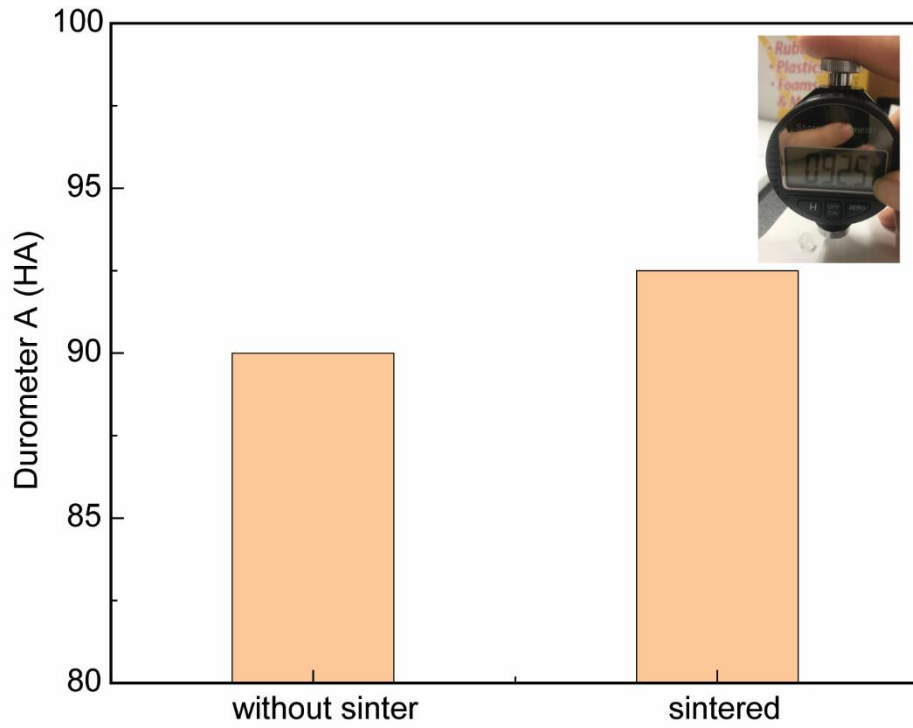

Fig. S6. Durometer hardness of samples with and without sintering treatment. The other samples cannot be indented due to the fragile microstructure.

Table S1. Parameters for solar intensity of solar simulator in this work

| Distance from illuminator<br>(inches(mm)) | Readings with standard AM 1.5 G Filter<br>(mW/cm <sup>2</sup> ) |
|-------------------------------------------|-----------------------------------------------------------------|
| 7 (178)                                   | 100                                                             |
| 9 (229)                                   | 69                                                              |

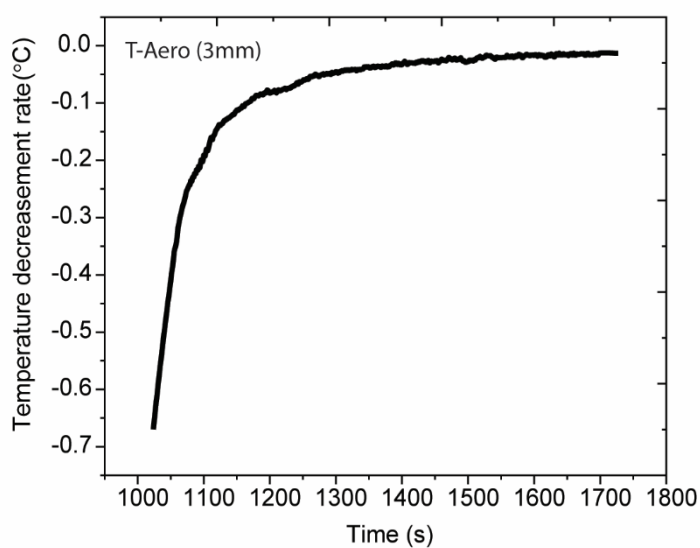

Fig. S7. Temperature decreasing rate profile after shutting off the solar simulator.
